14 **Abstract**

15 Results from biologging studies are often scaled up to population-level inferences and this begs  
16 the question: Are instrumented animals representative of the population given the potential bias  
17 in individual selectivity, the influence of capture, handling and wearing bio-loggers? The  
18 answer is elusive due to the challenges of obtaining comparable data from individuals without  
19 bio-loggers. Using non-invasive genetic data of a large carnivore, the wolverine (*Gulo gulo*) in  
20 Scandinavia, and an open-population spatial capture-recapture model, we were able to estimate  
21 and compare survival rates of individuals fitted with GPS collars versus individuals that had  
22 never been captured and collared. We found that mortality of GPS collared individuals was  
23 47% lower compared to individuals without GPS collars. While instrumented and non-  
24 instrumented wolverines had similar risks of dying from legal culling, GPS collared individuals  
25 displayed lower mortality rates due to causes other than legal culling. Reports of positive  
26 effects of biologging on the fitness of individuals are rather uncommon and we argue that the  
27 most likely explanation is that GPS-collars could shield animals from poaching. Our results  
28 highlight the challenges of drawing population level inferences for large carnivores when using  
29 data from an instrumented sample of the population.

30 **Introduction**

31 Telemetry and biologging systems have been instrumental in furthering our understanding of  
32 the ecology and cryptic behavior of wildlife. Technological development and miniaturization  
33 of devices have allowed researchers to track animals and obtain a wide range of previously  
34 unattainable information, such as fine scale movement data (Bischof et al. 2019), kill rates of  
35 predators (Gervasi et al. 2014), and habitat selection (Bouyer et al. 2015). Results from tracking  
36 studies are often scaled up to population-level inferences, with the assumption - explicit or  
37 implicit - that instrumented animals are representative of the population as a whole  
38 (Hebblewhite and Haydon 2010). There are two main reasons why this assumption may be  
39 violated: 1) the sample of instrumented individuals is non-random (i.e., a systematic bias in the

40 selection of individuals studied) and 2) biologging and tracking themselves alter the biology of  
41 instrumented animals. Despite the long history and widespread use of wildlife telemetry  
42 applications, it is challenging to assess the reliability of telemetry studies for inferring  
43 processes and patterns in wild populations. This is largely due to the inherent catch-22: the  
44 methods whose impact is to be evaluated are often seen as the only reliable methods available  
45 for obtaining the parameters that are potentially impacted.

46 ***Non-random sampling.*** Randomization is an essential requirement for inferring population  
47 properties from the properties of a sample. Yet, the selection of animal subjects enrolled in  
48 telemetry studies is rarely, if ever, fully randomized (Hebblewhite and Haydon 2010). For  
49 example, variation in the vulnerability to physical capture that is non-random with regards to  
50 biological attributes (such as behavior or fitness) is bound to lead to biased conclusions if  
51 estimates are extrapolated to the population level. Some deviations from representativeness  
52 may be easy to detect, such as a different age structure or gender ratio in the sample vs the  
53 population. Others, such as individual variation in boldness (Darrow and Shivik 2009) or social  
54 standing (Young et al. 2019) may not.

55 ***Observer effect.*** Aside from animal welfare concerns (Putman 1995), methods that impact the  
56 study species will inadvertently introduce bias as the system studied is altered through the  
57 process of observation/data collection, the so-called “observer effect” (Canine 1990,  
58 MacFarlane and King 2002). First, capturing and handling are stressful for animals (Cattet et  
59 al. 2008, Esteruelas et al. 2016). Second, although benign in most cases (Bodey et al., 2018),  
60 attaching bio-logger devices can influence behavior or even have long-term detrimental effects  
61 on individuals (Lechenne et al. 2012, Bodey et al. 2018).

62 In addition to direct effects of capture, handling, and wearing biologging device, the fitness of  
63 instrumented individuals can be impacted indirectly if awareness of the presence of biologging

64 devices alters human decision making in human-wildlife interactions. This may be particularly  
65 acute for rare, elusive, and controversial species such as large carnivores. Bio-logging is  
66 commonly used to study large carnivores and helps inform debate, policy, and management  
67 (Carricondo-Sanchez et al. 2020). Large carnivores are essential for ecosystem functioning but  
68 also get into conflict with humans as they prey on wild and domestic animals, and can  
69 occasionally injure or kill people (Packer et al. 2019). The resulting controversy and debate  
70 extend not only to large carnivore management, but also to the use of biologging in carnivore  
71 research. Indeed, this is not always perceived as positive by the public because captures are  
72 often costly and require the use of invasive techniques such as helicopter and anesthesia (Mech  
73 and Barber 2002). Furthermore, biologging can have indirect consequences for individuals as  
74 bio-loggers can interact with management decisions and lead to lethal actions that would have  
75 not occurred without the information provided by the logger (Meeuwig et al. 2015, Cooke et  
76 al. 2017). Real time information about individual location can also be made publicly available  
77 to avoid conflicts (Liberg et al. 2010) or be hacked by poachers (“cyber-poaching”,(Cooke et  
78 al. 2017)). Additionally, it has been suggested that instrumented animals could be protected  
79 from poaching due to the increased risk of detecting poaching events when animals wear a  
80 visible bio-logger. As a consequence, biologging of large carnivores may not only interfere  
81 directly with the behavior and fitness of individuals, but also indirectly by influencing  
82 management actions and illegal activities.

83 To investigate the effect of biologging, we used a decade worth of non-invasive genetic  
84 monitoring data of wolverines (*Gulo gulo*) in Scandinavia and compared survival rates of  
85 individuals with and without GPS collars using an open-population capture-recapture model.  
86 This unique data set contained data from individuals without capturing them, as both  
87 instrumented and non-instrumented individuals were sampled during monitoring. We show  
88 that instrumented large carnivores may not always constitute a representative sample of the

89 population and call for prudence when extrapolating survival estimates from instrumented  
90 individuals to populations.

## 91 **Material and methods**

### 92 *GPS collared individuals and study area*

93 Wolverines were equipped with GPS collars after being darted from a helicopter and  
94 immobilized with medetomidine–ketamine, following pre-established protocols (Arnemo et al.  
95 2012). GPS collars with GSM communication (GPS plus mini; Vectronic Aerospace GmbH,  
96 Berlin, Germany) were used. The collars were fitted with a release mechanism in the form of  
97 a cotton band that usually breaks apart after ~0.5 -2 years (depending on thickness of band and  
98 behavior of the animal). The handling protocols were approved by the Norwegian Experimental  
99 Animal Ethics Committee (FOTS ID 2826, FOTS ID 4699, FOTS 7017) and fulfilled their  
100 ethical requirements for research on wild animals. In addition, permits for wild animal capture  
101 were obtained from the Norwegian Environment Agency. Captures occurred in the winters  
102 (Jan-April) of 2010 to 2015. In total, we collared 43 individuals (♀21; ♂22), 18 in the Central  
103 (♀8; ♂10), and 25 in the Northern (♀13; ♂12) part of Norway (Appendix S1, Figure 1). Of  
104 these 18 (41%) were approximately 1-year old (average birthdate of wolverines 15<sup>th</sup> of  
105 February). The wolverine population is distributed continuously between the two regions  
106 where individuals were captured (Bischof et al. 2019). However, we distinguished between the  
107 Central and Northern areas so that instrumented and non-instrumented individuals were  
108 exposed to similar ecological conditions.

109 The northern study area is situated in Finnmark and Troms County (70°10' N , 24°70') and the  
110 Central area in Trøndelag County (64°30' N , 12°50' E). Troms and Finnmark have a coastal  
111 alpine climate, while Trøndelag has a more continental climate. The northern area is dominated  
112 by alpine tundra and mountain birch forest (*Betula pubescens*) forms the tree line. Northern  
113 boreal forest, dominated by conifer (*Pinus sylvestris*, *Picea abies*), is common at lower

114 elevations in the central area. High elevations of both areas are usually snow-covered from  
115 November to June. Free-ranging semi-domestic reindeer (*Rangifer tarandus*) is the most  
116 abundant ungulate in both areas. All reindeer herds migrate seasonally, but different husbandry  
117 practices and land use restrictions create variation in the timing, magnitude, and direction of  
118 the migrations. The coastal parts of Troms and Finnmark are almost completely devoid of  
119 reindeer in winter (Mattisson et al. 2011). In Trøndelag, seasonal migration is short, and most  
120 wolverine home ranges include both summer and winter reindeer-grazing areas. Free-ranging  
121 domestic sheep (*Ovis aries*) are present to a varying degree in both areas during summer.

### 122 *Non-invasive genetic sampling*

123 Wolverines are monitored annually by Swedish and Norwegian authorities using non-invasive  
124 genetic sampling (NGS) and dead recoveries (Gervasi et al. 2016). Scat and hair samples were  
125 collected on snow along wolverine tracks from December to June, covering the entire  
126 distribution range of the species in Scandinavia. Non-invasive genetic samples were collected  
127 from individuals ( $\geq 1$  year old), but not from young of the year. For further details on the DNA  
128 analysis procedure see (Flagstad et al. 2004, Brøseth et al. 2010, Gervasi et al. 2016). To ensure  
129 that the studied individuals with and without a GPS collars were exposed to similar conditions,  
130 we only considered non-invasive genetic samples collected within 70km of any genetic  
131 samples from collared individuals.

132 We used data from eight consecutive monitoring seasons (December-June) between 2009/10  
133 (i.e. the winter when wolverine captures started) and 2016/17. After the winter 2016/17, none  
134 of the wolverines were wearing a GPS collar. The non-invasive dataset contained a total of  
135 4989 (♀2446; ♂2543) genetically identified samples of which 2753 (♀1360; ♂1393) and 2236  
136 (♀1183; ♂1053) were collected in the Central- and Northern areas, respectively (Appendix S1  
137 Table S1). This corresponded to 1036 (♀555; ♂481) different individuals of which 616 (♀321;  
138 ♂295) and 421 (♀235; ♂186) were detected in the Central- and Northern areas, respectively

139 (Appendix S1 Table S1). Note that only one individual was detected in both study areas. We  
140 also obtained recovery locations and genetic identification data from 424 (♀219; ♂ 205)  
141 individuals legally culled during the study period. Occasionally, individuals recovered dead  
142 due to other reasons (e.g. poaching, car collision) were also reported (♀6; ♂ 5).

#### 143 *GPS covariate*

144 All collared individuals were genetically identified from tissue collected during the capture  
145 which allowed us to match them with the NGS dataset. We created an individual and time-  
146 dependent binary covariate (*GPS*) coding 1 if the individual was wearing a GPS collar at any  
147 time during the monitoring season, and 0 otherwise. The latter included individuals that were  
148 never captured, and individuals before they were collared or after losing their collar. With the  
149 use of this covariate, we intended to account for any contemporary effect caused by the GPS  
150 collar.

#### 151 *OPSCR model*

152 To estimate the survival rates of wolverines, we built an open population spatial capture-  
153 recapture (OPSCR) model (Ergon and Gardner 2014, Bischof et al. 2016, Chandler et al. 2018),  
154 which addresses three challenges associated with the analyses of population-level NGS data:  
155 1) detection is imperfect and heterogeneous in space and time (Kery and Schaub 2011), 2)  
156 individuals that reside primarily outside the surveyed area may be detected within it (Efford  
157 2004), and 3) estimation of true survival rate (Ergon and Gardner 2014).

158 We estimated separate model parameters for each region and sex, except for the parameters  
159 that concerned the quantification of the differences between GPS-collared versus not GPS-  
160 collared individuals. Due to sample size limitations, we did not break estimates down further  
161 and assumed that differences between collared versus non-collared animals were consistent  
162 across regions and sex.

163 The OPSCR model is a hierarchical state-space model composed of three sub-models: 1) a  
164 model for detections during DNA searches, 2) a model for population dynamics, and 3). a  
165 model for density and movements.

166 **The detection model** the detection model describes the relationship between individual  
167 detection probability and distance to its activity center (AC). We used the half-normal detection  
168 model that assumes that the probability  $p$  of detecting individual  $i$  at detector  $j$  and time  $t$   
169 decreases with distance ( $D_{ijt}$ ) between the detector and the AC:

$$170 \quad p_{i,j,t} = p_{0,i,j,t} \cdot \exp\left(\frac{-D_{i,j,t}^2}{2\sigma^2}\right) \quad \text{eqn 1}$$

171 where  $p_0$  represents the detection probability at the location of the AC, and  $\sigma$  represents the  
172 width of the utilization distribution.

173 We placed a detector grid within a buffer of 70 km surrounding all detections of captured  
174 individuals for each region (Appendix S1, Figure 1). The spatial domain was defined as the  
175 detector grid surrounded by a 60 km buffer. We used grid cells as detectors and aggregated  
176 detections to the closest grid cell center. We used a partially aggregated binomial model that  
177 divided detectors (10 km resolution) into 25 subdetectors (2 km) and modeled the frequency  
178 of subdetectors with more than one detection as a binomial response with a sample size of 25  
179 (for additional details see Milleret et al. 2018). To account for individual, spatial, and temporal  
180 heterogeneity in detection probability we included several linear effects on a logistic scale on  
181 the baseline detection probability ( $p_0$ ) (Appendix S2):

182 **The multistate model** We used a multistate formulation for the population dynamics model  
183 (Lebreton and Pradel 2002) where each individual life history is represented by a succession  
184 of discrete states  $z_{it}$  that arises from a Markov process. Between two consecutive years, an  
185 individual  $i$  can either remain in its current state or transition to another one, with transition  
186 probabilities corresponding to vital rates. We considered four different states: “unborn” if the



187 individual has not yet been recruited in the population. “alive” if it is alive. “dead legal” if it  
188 has died from legal culling between the start of the previous and current monitoring seasons.  
189 “Dead”: if it has a) died from any other cause of mortality between the start of the previous and  
190 current monitoring seasons or b) died earlier, regardless of the cause.

191 During the first occasion, individuals can only be designated as “unborn” or “alive” so that  
192  $z_{i,1} \sim \text{dcat}(1 - \psi, \psi, 0, 0)$ , where  $\psi$  represents the probability to be already part of the population  
193 at  $t=1$ .

194 For  $t \geq 2$ ,  $z_{i,t}$  is conditional on the state of individual  $i$  at  $t-1$ :

- 195 • If  $z_{i,t-1} = 1$ , individual  $i$  is available to be recruited (transition to state 2), so  $z_{i,t} \sim \text{dcat}(1 -$   
196  $\gamma_t, \gamma_t, 0, 0)$ .
- 197 • If  $z_{i,t-1} = 2$  individual  $i$  can survive and remain  $z_{i,t} = 2$  with probability  $\Phi_t$ , die from culling  
198 and transition to  $z_{i,t} = 3$  with probability  $h_t$  or die from other causes and transition to  $z_{i,t}$   
199  $= 4$  with probability  $w_t$ , so that  $z_{i,t} \sim \text{dcat}(0, \Phi_t, h_t, w_t)$ , where  $\Phi_t = 1 - h_t - w_t$
- 200 • Finally, all individuals in dead states ( $z_{i,t-1} = 3$  or  $4$ ) transition to  $z_{i,t-1} = 4$ , the absorbing  
201 state, with probability 1.

202 To quantify differences in mortality rates between collared and non-collared individuals,  
203 we included the effect of the *GPS* covariate as a linear effect on the logistic scale for both  
204 culling ( $h$ ) and other ( $w$ ) mortality rates:

$$205 \quad \text{logit}(w_{i,t}) = w0_t + \beta w_{GPS} * GPS_{i,t}$$

$$206 \quad \text{logit}(h_{i,t}) = h0_t + \beta h_{GPS} * GPS_{i,t} \quad \text{eqn 3}$$

207 Note that we estimated separate  $\beta$  parameters for each region and sex.

208 The detection data  $y_{ijt}$  was modelled as the realization of a Binomial process based on the  
209 individual, detector, and time specific detection probability  $p_{i,j,t}$ , the number of trials defined

210 as the number subdetectors  $K$ , and conditional on individual state  $z_{i,t}$  (only individuals with the  
211 state “alive” can be detected.):

$$212 \quad y_{i,j,t} \sim \text{Binomial}(p_{0_{i,j,t}} * I(z_{i,t} = 2), K_j) \quad \text{eqn 4}$$

213 **The movement model** We used an inhomogeneous binomial point process to model the  
214 distribution of individual ACs (Illian et al. 2008). This formulation allows the density of ACs  
215 to vary according to a spatial intensity function. ACs ( $s$ ) at  $t = 1$  were placed according to the  
216 intensity function  $\lambda(s_1)$ , that was based on a spatial covariate ( $Dens$ ; locations of known dens  
217 from den visits conducted by authorities in their effort to document reproductions per 20 km  
218 habitat cell) that roughly reflects the species distributions  $\lambda(s_1) = e^{\beta_{dens} \cdot Dens(s_1)}$ . For  $t \geq 2$ , the  
219 intensity function was a combination of the intensity surface representing AC distribution  
220 ( $\beta_{Dens}$ ) and an isotropic multivariate normal distribution centered around the source  
221 coordinates (location of the AC at  $t-1$ ) with standard deviation  $\tau$  (see (Milleret et al. 2020) for  
222 more details). As a consequence, individual movement from year to year was modelled as a  
223 Markovian spatial point process. This feature of the model improves survival estimates as it  
224 takes into account the impact of animals moving within and out of the sampled area (Ergon  
225 and Gardner 2014, Gardner et al. 2018).

#### 226 *Parameter estimation*

227 We fitted the Bayesian OPSCR models using Markov chain Monte Carlo (MCMC) simulation  
228 with NIMBLE (de Valpine et al. 2017, NIMBLE Development Team 2019) in R version 3.3.3  
229 (R Core Team 2018). We implemented different modelling techniques to increase MCMC  
230 efficiency (available in the nimbleSCR package (Bischof et al. 2020); see (Milleret et al. 2018,  
231 2019, 2020, Turek et al. 2020) for details). We ran 4 chains, each with 42,500 iterations  
232 including a 12,500-iteration burn-in period. We considered models as converged when the  
233 Gelman-Rubin diagnostic (Rhat, (Gelman and Rubin 1992)) was  $< 1.1$  for all parameters and

234 by visually inspecting the trace plots. We summarized posterior distributions using their  
235 median and 95% credible interval (CrI).

## 236 **Results**

237 Collared wolverines had a 47% (95% CrI: [21%;68%]) lower overall mortality rate compared  
238 to non-collared individuals (Figure 1). This difference was attributable mainly to lower  
239 mortality rate due to causes other than legal culling ( $\beta_{W_{GPS}} = -1.08$  [-1.86; -0.46]), and to a  
240 lesser extent to a lower mortality rate due to culling ( $\beta_{h_{GPS}} = -0.37$  [-1.09; 0.25]; Figure 1). On  
241 average, individuals with a collar had 58% [29; 80%] reduced probability to die from mortality  
242 due to causes other than legal culling than individuals without a GPS collar. Individuals  
243 wearing a GPS collar had a lower detectability rate compared to individuals without GPS collar  
244 ( $\beta_{p_{0_{GPS}}} = -0.80$  [-1.04; -0.60]). Additional details are presented in Appendix S1 Figure S2-6.

## 245 **Discussion**

246 Using a single individual-based dataset containing wolverines both with and without a GPS  
247 collar, and an open population spatial capture-recapture model, we were able to provide a  
248 quantitative answer to a question that has eluded wildlife ecologists: can we extrapolate results  
249 obtained from a limited number of instrumented individuals to the population? We found that  
250 wolverines with a GPS collar had a lower mortality rate compared to individuals without a  
251 collar. Although collared individuals seemed to have slightly lower mortality associated with  
252 legal culling, the difference was mainly manifested through a lower mortality rate due to other  
253 causes. Our results call for prudence when extrapolating vital rate estimates from a sample of  
254 instrumented large carnivores to the population.

255 There are three main potential, not mutually exclusive, explanations for the observed difference  
256 in mortality between wolverines with and without GPS collar: a) wolverines selected for GPS-  
257 collaring had mortality that differed from the population average (“non-random sample”), b)

258 instrumentation altered wolverine survival (“observer effect”), and c) that our NGS and  
259 OPSCR-based approach to mortality estimation inadvertently introduced a bias (“analytical  
260 artifact”). Being observational in nature, our study does not allow us to isolate an explanation  
261 unequivocally. However, we argue that the observer effect could be the primary cause for the  
262 observed difference in mortality between instrumented and non-instrumented animals.

263 **Analytical artifact** – Our OPSCR model aimed at quantifying population dynamics of  
264 wolverines while accounting for imperfect detection inherent to NGS data. To reduce the  
265 chances of introducing a bias with our OPSCR model by inadvertently comparing different  
266 parts of the population, we restricted the spatial (Appendix S1, Figure S1) and temporal extents  
267 of the analysis to limit the differences in ecological conditions that individuals with and without  
268 collars are exposed to. Furthermore, we accounted for individual, temporal, and spatial  
269 heterogeneity in detectability in the population-level OPSCR model, including potential  
270 differences in detectability between GPS collared and non-collared individuals. All OPSCR  
271 model parameters, except parameters linked with the effect of wearing a GPS collar, were also  
272 sex- and region-specific thereby accounting for possibly important sources of variation.

273 **Non-random sampling** – Non-invasive genetic sampling and the collaring of wolverines  
274 targeted all segments of the population (except cubs of the year). Captures from helicopter also  
275 occurred opportunistically by following any fresh wolverine tracks encountered on snow,  
276 without intentional focus on a specific part of the population. Captures may have been  
277 unintentionally biased towards individuals whose tracks are likely to be encountered (e.g.,  
278 animals moving in open areas and traveling longer distances) and those that are more  
279 vulnerable to capture once detected (e.g. young individuals). Indeed, the proportion of 1-year  
280 old among collared individuals (41%) was higher than their expected prevalence in the  
281 population (29%; Landa et al. 1998). With a negative age-mortality relationship (Persson et al.  
282 2009)(Persson et al. 2009), the proportion of young individuals among GPS-collared individual

283 being higher than expected for this wolverine population, we would expect higher mortality  
284 among GPS tagged animals than the population average. Yet, we detected the opposite effect,  
285 which suggests that the explanation for the mortality difference lies elsewhere.

286 *Observer effect* –. A third possibility is that wearing a GPS collar itself impacts mortality of  
287 instrumented wolverines. Mortality due to other causes includes three main causes that our  
288 study can not differentiate: 1) natural (e.g., age, diseases, intra and inter-specific killing), 2)  
289 traffic, and 3) illegal killing. The literature generally reports negative or neutral effect of the  
290 capture, handling, and wearing of bio-logger on the survival of individuals (Sergio et al. 2015,  
291 Bodey et al. 2018), and we are not aware of any mechanisms that could give a competitive  
292 advantage to GPS collared wolverines to a magnitude that would decrease their natural or  
293 traffic mortality rates. Although patterns of carnivore mortality due to causes other than culling  
294 remain cryptic, we know that illegal culling account for a large part of carnivore mortality in  
295 Scandinavia (Persson et al. 2009, Liberg et al. 2011, Milleret et al. 2016, Rauset et al. 2016).  
296 Therefore, a plausible explanation for the observed result is that GPS collars could shield  
297 individuals against illegal killing. First, the collar in itself can act as a deterrent as the likelihood  
298 of detecting poaching events increases. Secondly, the wolverines were captured as part of a  
299 wildlife-human conflict project studying predation on semi-domestic reindeer and sheep (e.g.  
300 Mattisson et al. 2016). In Norway, compensation for livestock losses to carnivores is estimated  
301 based on the number of detected domestic preys that could be documented as killed by a  
302 carnivore. As information provided by the GPS collar is partly used to conduct predation  
303 studies, it generally results in a higher number of documented kills, which could give an  
304 incentive to keep GPS collared individuals alive.

305 Instrumented versus non-instrumented individuals have been suggested to have different  
306 survival rates in other large carnivore populations (Schmidt et al. 2015, Borg et al. 2016, Treves  
307 et al. 2017), but evaluating the representativeness of instrumented individuals is particularly

308 challenging as it also requires to obtain data on non-instrumented individuals. Using a  
309 comprehensive spatially explicit population-level model taking into account imperfect  
310 detection inherent to non-invasive genetic sampling, we showed that GPS collared large  
311 carnivores may not always constitute a representative sample of the population for the  
312 estimation of survival rates. Although our OPSCR model would greatly benefit from  
313 incorporating age structure, age information was not available for individuals detected solely  
314 with NGS. To our knowledge, this study is the first to compare survival rates of carnivores  
315 with and without telemetry collars, using an independent source of data collected at the  
316 individual level, and a comprehensive statistical framework that takes into account imperfect  
317 detection. Regardless of the exact mechanisms behind the non-representativeness of the  
318 instrumented sample, it has important implication for management and conservation, as many  
319 studies use data from GPS collared individuals to draw population-level inferences  
320 (Hebblewhite and Haydon 2010) and to parameterize population level models (Liberg et al.  
321 2011).

## 322 **Authors contribution**

323 C.M developed the concept of this study with input from R.B and P.D. J.M and J.O provided  
324 data on captured wolverines. Wolverine genetic data extraction and preparation were  
325 coordinated by H.B. C.M led the analysis with help from R.B and P.D. C.M led the writing  
326 with contributions from R.B, P.D, H.B, J.O and J.M. All authors gave final approval for  
327 publication.

## 328 **Data**

329 Data, R script and nimble codes are available on github repository [https://github.com/Cyril-](https://github.com/Cyril-Milleret/Public/tree/master/WolverineGPSSurvival)  
330 [Milleret/Public/tree/master/WolverineGPSSurvival](https://github.com/Cyril-Milleret/Public/tree/master/WolverineGPSSurvival)

## 331 **Acknowledgment**

332 This work was funded by the Norwegian Environment Agency (Miljødirektoratet), the Swedish  
333 Environmental Protection Agency (Naturvårdsverket), and the Research Council of Norway  
334 (NFR 286886). The County administrations in Trøndelag, Troms, and Finnmark, the Carnivore  
335 Management Boards in regions 6 and 8, and the Reindeer Development Fund in Norway also  
336 provided financial assistance. We thank the field staff from the State Nature Inspectorate and  
337 members of the public that collected the monitoring data for the large carnivore database  
338 Rovbase3.0 (rovbase.no, rovbase.se). Computations/simulations were performed on resources  
339 provided by NMBU's computing cluster "Orion". A special thanks to P. Segerström, E.  
340 Segerström, T. Strømseth, and J. M. Arnemo for catching and collaring the wolverines, and the  
341 State Nature Inspectorate, reindeer herders, and all additional people that have contributed to  
342 captures and data collection in the field. We also thanks P. de Valpine and D. Turek for their  
343 assistance with NIMBLE.

## 344 **References**

- 345 Arnemo, J. M., A. L. Evans, and A. Fahlman. 2012. Biomedical protocols for free-ranging  
346 brown bears, gray wolves, wolverines and lynx. Hedmark University College. Evenstad,  
347 Norway.
- 348 Bischof, R., H. Brøseth, and O. Gimenez. 2016. Wildlife in a Politically Divided World:  
349 Insularism Inflates Estimates of Brown Bear Abundance. *Conservation Letters* 9:122–  
350 130.
- 351 Bischof, R., J. G. O. Gjevestad, A. Ordiz, K. Eldegard, and C. Milleret. 2019. High frequency  
352 GPS bursts and path-level analysis reveal linear feature tracking by red foxes. *Scientific*  
353 *reports* 9:1–13.
- 354 Bischof, R., D. Turek, C. Milleret, T. Ergon, P. Dupont, and P. de Valpine. 2020.  
355 nimbleSCR: Spatial Capture-Recapture (SCR) Methods Using "nimble."
- 356 Bodey, T. W., I. R. Cleasby, F. Bell, N. Parr, A. Schultz, S. C. Votier, and S. Bearhop. 2018.  
357 A phylogenetically controlled meta-analysis of biologging device effects on birds:  
358 Deleterious effects and a call for more standardized reporting of study data. *Methods in*  
359 *Ecology and Evolution* 9:946–955.
- 360 Borg, B. L., S. M. Arthur, N. A. Broman, K. A. Cassidy, R. McIntyre, D. W. Smith, and L. R.  
361 Prugh. 2016. Implications of harvest on the boundaries of protected areas for large  
362 carnivore viewing opportunities. *PLoS one* 11:e0153808.

- 363 Brøseth, H., Ø. Flagstad, C. Wårdig, M. Johansson, and H. Ellegren. 2010. Large-scale  
364 noninvasive genetic monitoring of wolverines using scats reveals density dependent  
365 adult survival. *Biological Conservation* 143:113–120.
- 366 Canine, N. G. 1990. Unrecognized anti-predator behaviour can bias observational data.  
367 *Animal Behaviour* 39:195–197.
- 368 Carricondo-Sanchez, D., B. Zimmermann, P. Wabakken, A. Eriksen, C. Milleret, A. Ordiz,  
369 A. Sanz-Pérez, and C. Wikenros. 2020. Wolves at the door? Factors influencing the  
370 individual behavior of wolves in relation to anthropogenic features. *Biological*  
371 *Conservation* 244:108514.
- 372 Cattet, M., J. Boulanger, G. Stenhouse, R. A. Powell, and M. J. Reynolds-Hogland. 2008. An  
373 evaluation of long-term capture effects in ursids: implications for wildlife welfare and  
374 research. *Journal of Mammalogy* 89:973–990.
- 375 Chandler, R. B., J. Hepinstall-Cymerman, S. Merker, H. Abernathy-Conners, and R. J.  
376 Cooper. 2018. Characterizing spatio-temporal variation in survival and recruitment with  
377 integrated population models. *The Auk* 135:409–426.
- 378 Cooke, S. J., V. M. Nguyen, S. T. Kessel, N. E. Hussey, N. Young, and A. T. Ford. 2017.  
379 Troubling issues at the frontier of animal tracking for conservation and management.  
380 *Conservation Biology* 31:1205–1207.
- 381 Darrow, P. A., and J. A. Shivik. 2009. Bold, shy, and persistent: Variable coyote response to  
382 light and sound stimuli. *Applied Animal Behaviour Science* 116:82–87.
- 383 Efford, M. 2004. Density estimation in live-trapping studies. *Oikos* 106:598–610.
- 384 Ergon, T., and B. Gardner. 2014. Separating mortality and emigration: modelling space use,  
385 dispersal and survival with robust-design spatial capture-recapture data. *Methods in*  
386 *Ecology and Evolution* 5:1327–1336.
- 387 Esteruelas, N. F., N. Huber, A. L. Evans, A. Zedrosser, M. Cattet, F. Palomares, M. Angel, J.  
388 E. Swenson, and J. M. Arnemo. 2016. Leukocyte coping capacity as a tool to assess  
389 capture- and handling-induced stress in scandinavian brown bears (*ursus arctos*). *Journal*  
390 *of Wildlife Diseases* 52:S40–S53.
- 391 Flagstad, Ø., E. V. A. Hedmark, A. Landa, H. Brøseth, J. Persson, R. Andersen, P.  
392 Segerström, and H. Ellegren. 2004. Colonization history and noninvasive monitoring of  
393 a reestablished wolverine population. *Conservation Biology* 18:676–688.
- 394 Gardner, B., R. Sollmann, N. S. Kumar, D. Jathanna, and K. U. Karanth. 2018. State space  
395 and movement specification in open population spatial capture-recapture models.  
396 *Ecology and Evolution* 0.
- 397 Gelman, A., and D. B. Rubin. 1992. Inference from iterative simulation using multiple  
398 sequences. *Statistical Science* 7:457–511.
- 399 Gervasi, V., H. Brøseth, O. Gimenez, E. B. Nilsen, and J. D. C. Linnell. 2014. The risks of  
400 learning: confounding detection and demographic trend when using count-based indices  
401 for population monitoring. *Ecology and Evolution* 4:4637–4648.
- 402 Gervasi, V., H. Brøseth, O. Gimenez, E. B. Nilsen, J. Odden, Ø. Flagstad, and J. D. C.  
403 Linnell. 2016. Sharing data improves monitoring of trans-boundary populations: the case  
404 of wolverines in central Scandinavia. *Wildlife Biology* 22:95–106.



- 405 Hebblewhite, M., and D. T. Haydon. 2010. Distinguishing technology from biology: a critical  
406 review of the use of GPS telemetry data in ecology. *Philosophical Transactions of the*  
407 *Royal Society B: Biological Sciences* 365:2303–2312.
- 408 Illian, J., A. Penttinen, H. Stoyan, and D. Stoyan. 2008. *Statistical analysis and modelling of*  
409 *spatial point patterns*. John Wiley & Sons.
- 410 Kery, M., and M. Schaub. 2011. *Bayesian Population Analysis using WinBUGS: A*  
411 *Hierarchical Perspective*. Elsevier Science.
- 412 Landa, A., J. Tufto, R. Franzén, T. Bø, M. Lindén, and J. E. Swenson. 1998. Active  
413 wolverine *Gulo gulo dens* as a minimum population estimator in Scandinavia. *Wildlife*  
414 *Biology* 4:159–168.
- 415 Lebreton, J. D., and R. Pradel. 2002. Multistate recapture models: Modelling incomplete  
416 individual histories. *Journal of Applied Statistics* 29:353–369.
- 417 Lechenne, M., J. Arnemo, C. Brøjer, H. André, and E. Agren. 2012. Mortalities due to  
418 constipation and dystocia caused by intraperitoneal radio-transmitters in Eurasian lynx  
419 (*Lynx lynx*). *European Journal of Wildlife Research* 58.
- 420 Liberg, O., Å. Aronson, S. M. Brainerd, J. Karlsson, H.-C. Pedersen, H. Sand, and P.  
421 Wabakken. 2010. Integrating research into management of a recolonizing wolf  
422 population – the Scandinavian model. Page in M. Musiani, L. Boitani, and P. Paquet,  
423 editors. (Eds.). *The World of Wolves: New perspectives on ecology, behaviour and*  
424 *policy*. University of Calgary Press, Calgary, Alberta, Canada.
- 425 Liberg, O., G. Chapron, P. Wabakken, H. C. Pedersen, N. T. Hobbs, and H. Sand. 2011.  
426 Shoot, shovel and shut up: cryptic poaching slows restoration of a large carnivore in  
427 Europe. *Proceedings of the Royal Society B: Biological Sciences* 279:910–915.
- 428 MacFarlane, G., and S. King. 2002. Observer presence influences behaviour of the  
429 semaphore crab, *Heloeccius cordiformis*. *Animal Behaviour - ANIM BEHAV* 63:1191–  
430 1194.
- 431 Mattisson, J., J. Odden, E. B. Nilsen, J. D. C. Linnell, J. Persson, and H. André. 2011.  
432 Factors affecting Eurasian lynx kill rates on semi-domestic reindeer in northern  
433 Scandinavia: Can ecological research contribute to the development of a fair  
434 compensation system? *Biological Conservation* 144:3009–3017.
- 435 Mattisson, J., G. R. Rauset, J. Odden, H. André, J. D. C. Linnell, and J. Persson. 2016.  
436 Predation or scavenging? Prey body condition influences decision-making in a  
437 facultative predator, the wolverine. *Ecosphere* 7:e01407.
- 438 Mech, L. D., and S. M. Barber. 2002. *A critique of wildlife radio-tracking and its use in*  
439 *national parks*. Northern Prairie Wildlife Research Center.
- 440 Meeuwig, J. J., R. G. Harcourt, and F. G. Whoriskey. 2015. When Science Places Threatened  
441 Species at Risk. *Conservation Letters* 8:151–152.
- 442 Milleret, C., P. Dupont, C. Bonenfant, H. Brøseth, Ø. Flagstad, C. Sutherland, and R.  
443 Bischof. 2019. A local evaluation of the individual state-space to scale up Bayesian  
444 spatial capture–recapture. *Ecology and Evolution* 9:352–363.
- 445 Milleret, C., P. Dupont, H. Brøseth, J. Kindberg, A. Royle J., and R. Bischof. 2018. Using  
446 partial aggregation in spatial capture recapture. *Methods in Ecology and Evolution* 0.

- 447 Milleret, C., P. Dupont, J. Chipperfield, D. Turek, H. Brøseth, O. Gimenez, P. de Valpine,  
448 and R. Bischof. 2020. Estimating abundance with interruptions in data collection using  
449 open population spatial capture-recapture models. *Ecosphere* 11:e03172.
- 450 Milleret, C., P. Wabakken, O. Liberg, M. Åkesson, Ø. Flagstad, H. P. Andreassen, and H.  
451 Sand. 2016. Let's stay together? Intrinsic and extrinsic factors involved in pair bond  
452 dissolution in a recolonizing wolf population. *Journal of Animal Ecology*.
- 453 NIMBLE Development Team. 2019. NIMBLE: MCMC, Particle Filtering, and  
454 Programmable Hierarchical Modeling. <https://cran.r-project.org/package=nimble>.
- 455 Packer, C., S. Shivakumar, V. Athreya, M. E. Craft, H. Dhanwatey, P. Dhanwatey, B.  
456 Gurung, A. Joshi, H. Kushnir, J. D. C. Linnell, and N. M. Fountain-Jones. 2019.  
457 Species-specific spatiotemporal patterns of leopard, lion and tiger attacks on humans.  
458 *Journal of Applied Ecology* 56:585–593.
- 459 Persson, J., G. Ericsson, and P. Segerström. 2009. Human caused mortality in the endangered  
460 Scandinavian wolverine population. *Biological conservation* 142:325–331.
- 461 R Core Team. 2018. R: A language and environment for statistical computing. Vienna, .  
462 Austria: R Foundation for Statistical Computing.
- 463 Rauset, G. R., H. Andrén, J. E. Swenson, G. Samelius, P. Segerström, A. Zedrosser, and J.  
464 Persson. 2016. National Parks in Northern Sweden as Refuges for Illegal Killing of  
465 Large Carnivores. *Conservation Letters*.
- 466 Schmidt, J. H., D. S. Johnson, M. S. Lindberg, and L. G. Adams. 2015. Estimating  
467 demographic parameters using a combination of known-fate and open N-mixture  
468 models. *Ecology* 96:2583–2589.
- 469 Sergio, F., G. Tavecchia, A. Tanferna, L. López Jiménez, J. Blas, R. De Stephanis, T. A.  
470 Marchant, N. Kumar, and F. Hiraldo. 2015. No effect of satellite tagging on survival,  
471 recruitment, longevity, productivity and social dominance of a raptor, and the  
472 provisioning and condition of its offspring. *Journal of Applied Ecology* 52:1665–1675.
- 473 Treves, A., J. A. Langenberg, J. V López-Bao, and M. F. Rabenhorst. 2017. Gray wolf  
474 mortality patterns in Wisconsin from 1979 to 2012. *Journal of mammalogy* 98:17–32.
- 475 Turek, D., C. Milleret, T. Ergon, H. Brøseth, and P. de Valpine. 2020. Efficient Estimation of  
476 Large-Scale Spatial Capture-Recapture Models. *bioRxiv*.
- 477 de Valpine, P., D. Turek, C. J. Paciorek, C. Anderson-Bergman, D. T. Lang, and R. Bodik.  
478 2017. Programming with models: writing statistical algorithms for general model  
479 structures with NIMBLE. *Journal of Computational and Graphical Statistics* 26:403–  
480 413.
- 481 Young, J. K., L. Touzot, and S. P. Brummer. 2019. Persistence and conspecific observations  
482 improve problem-solving abilities of coyotes. *PloS one* 14:e0218778.
- 483
- 484

485 **Figures legend:**

486 **Figure 1.**

487 Posterior distributions of wolverine mortality rates with and without a GPS collar obtained  
488 using a Bayesian open population spatial capture-recapture model and data from non-invasive  
489 genetic sampling in Scandinavia. Proportional differences (95% credible interval) in  
490 mortality rates between individuals with and without a GPS collar are depicted for males in  
491 the northern area and between the monitoring season 2010/11-2011/12. Proportional  
492 differences in mortality rates between individuals with and without a GPS collar depended on  
493 the baseline probabilities ( $h_0, w_0$ ) that varied with year, sex, and regions because the effect  
494 of capture on mortality rates ( $\beta_{w_{GPS}}, \beta_{h_{GPS}}$ ) were quantified on the logit scale. The picture  
495 shows one of the studied wolverines wearing a GPS collar (©Thomas Strømseth).

496

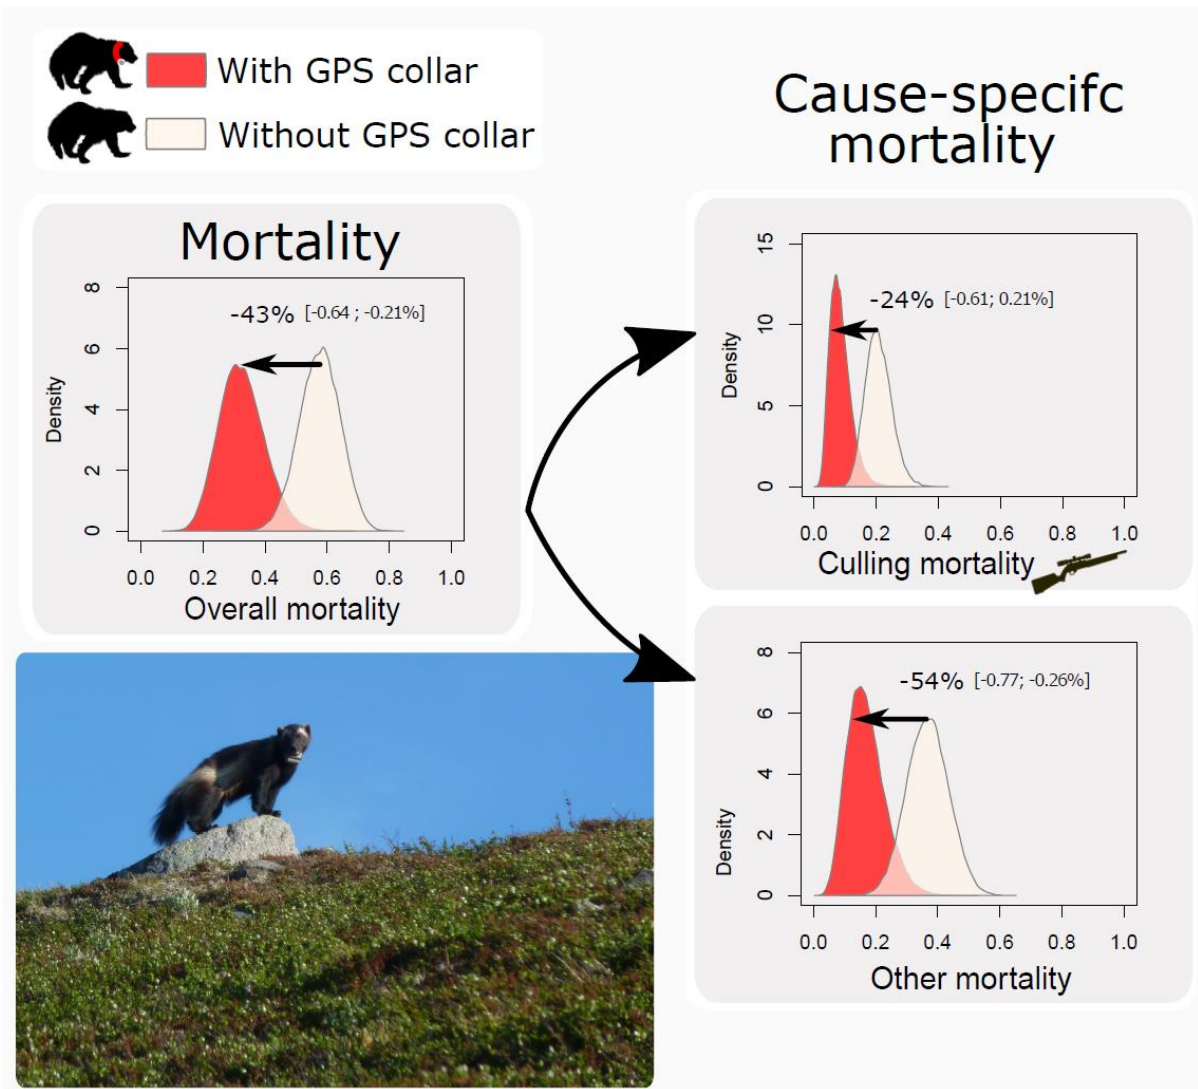

500 **Appendix S1 : Instrumented individuals are not representative of the population.**

501 **Survival of wolverines with and without GPS collars**

502

503

504 **Cyril Milleret, Richard Bischof, Pierre Dupont, Henrik Brøseth, John Odden, Jenny**

505 **Mattisson**

506

507 **Table S1.** Summary of the number of non-invasive genetic samples from wolverines and  
 508 individuals genetically identified from 2009/10-2016/17 in the Central and Northern study  
 509 areas (see Figure 1) for females (F) and males (M).

510

| <b>Year</b>                   | <b>2009</b>    | <b>2010</b> | <b>2011</b> | <b>2012</b> | <b>2013</b> | <b>2014</b> | <b>2015</b> | <b>2016</b> | <b>Total</b> |
|-------------------------------|----------------|-------------|-------------|-------------|-------------|-------------|-------------|-------------|--------------|
| <b>N detections</b>           |                |             |             |             |             |             |             |             |              |
| <b>Sex</b>                    | <b>Central</b> |             |             |             |             |             |             |             |              |
| <b>M</b>                      | 129            | 109         | 145         | 176         | 177         | 187         | 213         | 257         | 1393         |
| <b>F</b>                      | 169            | 108         | 149         | 149         | 199         | 162         | 212         | 212         | 1360         |
|                               | <b>North</b>   |             |             |             |             |             |             |             |              |
| <b>M</b>                      | 124            | 113         | 148         | 116         | 168         | 98          | 121         | 165         | 1053         |
| <b>F</b>                      | 124            | 99          | 167         | 107         | 182         | 139         | 134         | 231         | 1183         |
| <b>N individuals detected</b> |                |             |             |             |             |             |             |             |              |
|                               | <b>Central</b> |             |             |             |             |             |             |             |              |
| <b>M</b>                      | 55             | 49          | 64          | 70          | 61          | 64          | 72          | 73          | 508          |
| <b>F</b>                      | 71             | 53          | 67          | 75          | 80          | 73          | 87          | 91          | 597          |
|                               | <b>North</b>   |             |             |             |             |             |             |             |              |
| <b>M</b>                      | 50             | 39          | 49          | 34          | 43          | 32          | 31          | 35          | 313          |
| <b>F</b>                      | 55             | 48          | 77          | 48          | 69          | 62          | 59          | 72          | 490          |

511

512

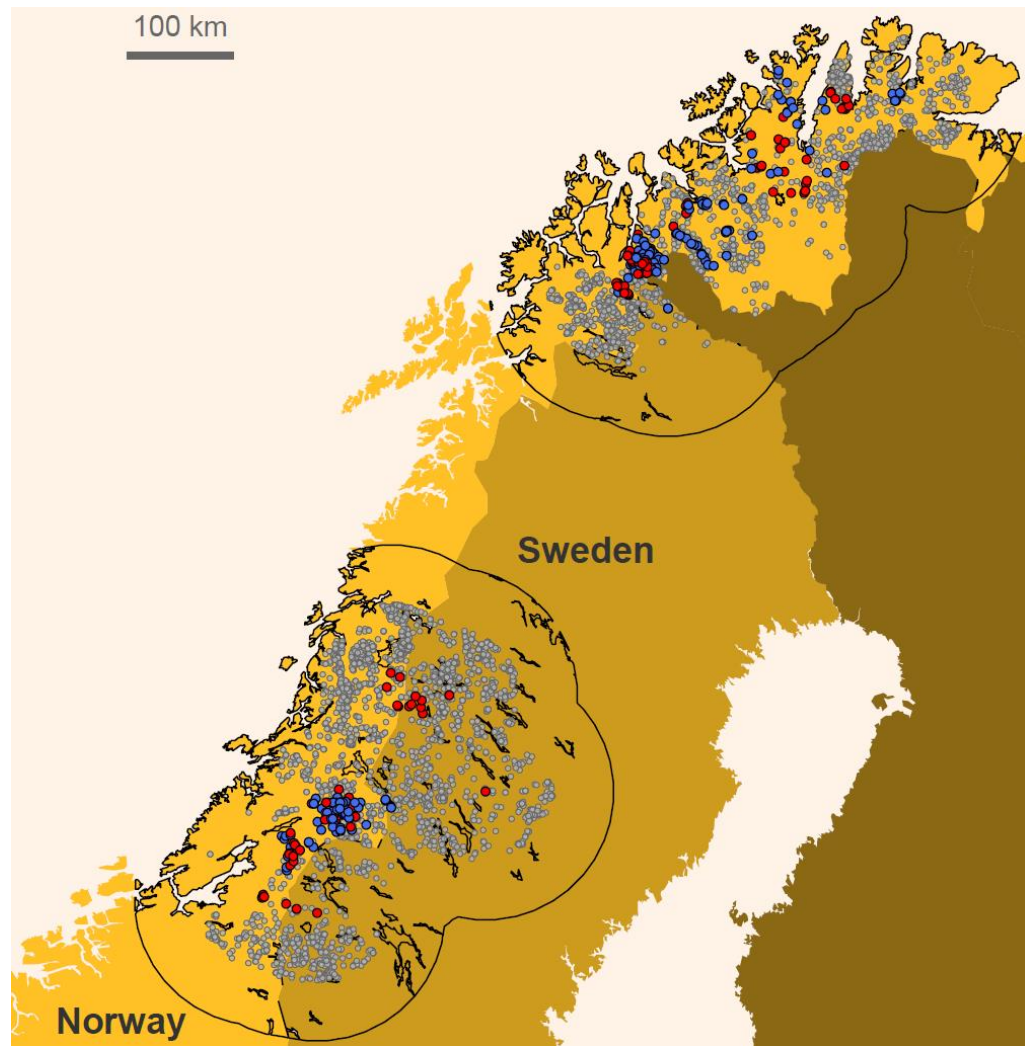

**Figure S1.**

Locations of non-invasive genetic samples of wolverines collected during eight consecutive monitoring seasons (December– June; 2009/10-2016/17) in Sweden and Norway. Blue and red dots show genetically identified samples from male and female individuals with GPS-collars, respectively. Grey dots represent detections from all other individuals. Polygons with a black outline represent the two study areas (North and Center) and include the buffer (area of the polygon without detections) considered in the open-population spatial capture-recapture analysis.

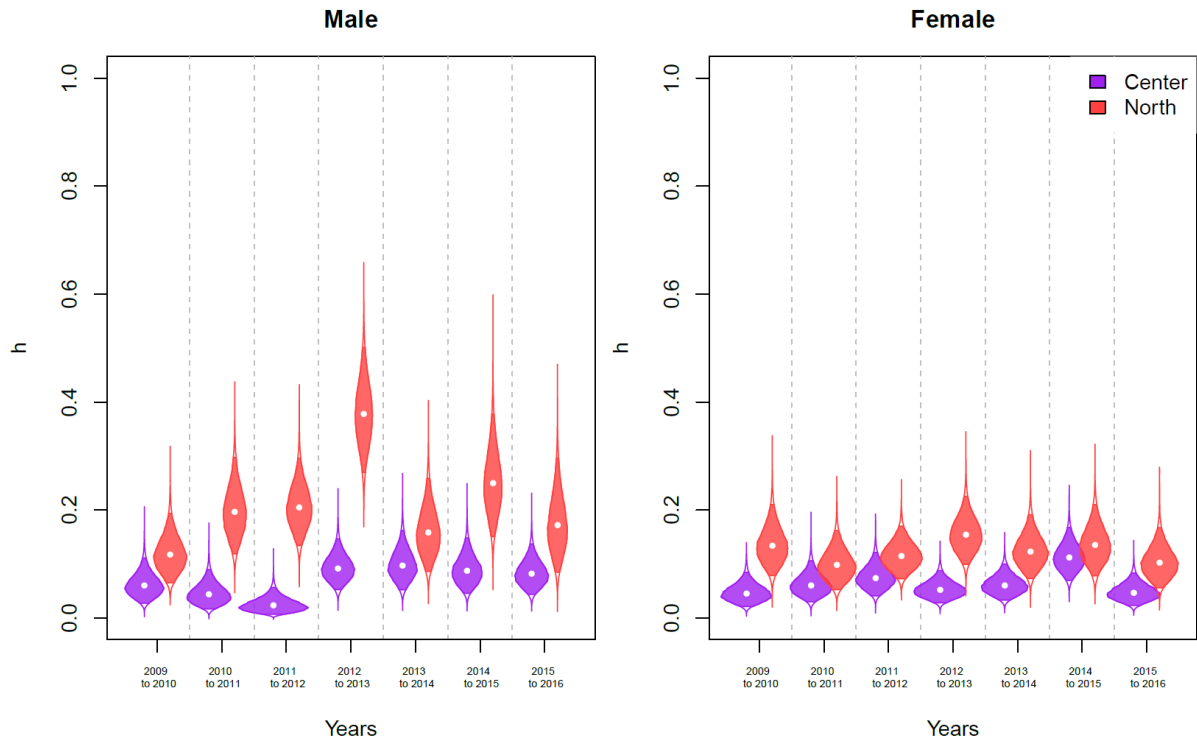

514

515 **Figure S2.** Mortality probabilities due to legal culling ( $h$ ) for male and female wolverines.

516 Shown are overall estimates throughout the Central and Northern study areas (Figure 1).

517 Violins show the posterior distribution of mortality estimates (points: median estimates; solid

518 colors: 95% credible interval). Estimates reflect mortalities occurring between the start of one

519 sampling season and the start of the next.

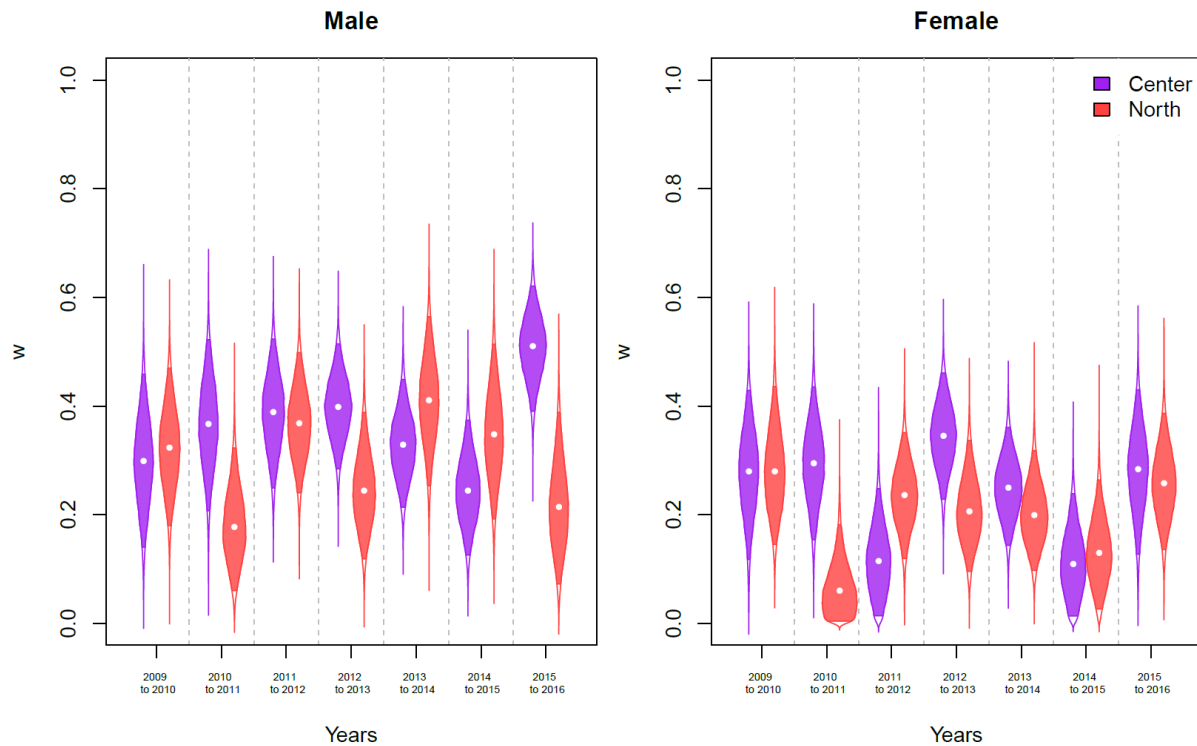

520

521 **Figure S3.** Mortality probabilities due to causes other than legal culling ( $w$ ) for male and  
522 female wolverines. Shown are overall estimates throughout the Central and Northern study  
523 areas (Figure 1). Violins show the posterior distribution of mortality estimates (points:  
524 median estimates; solid colors: 95% credible interval). Estimates reflect mortalities occurring  
525 between the start of one sampling season and the start of the next.

526

527

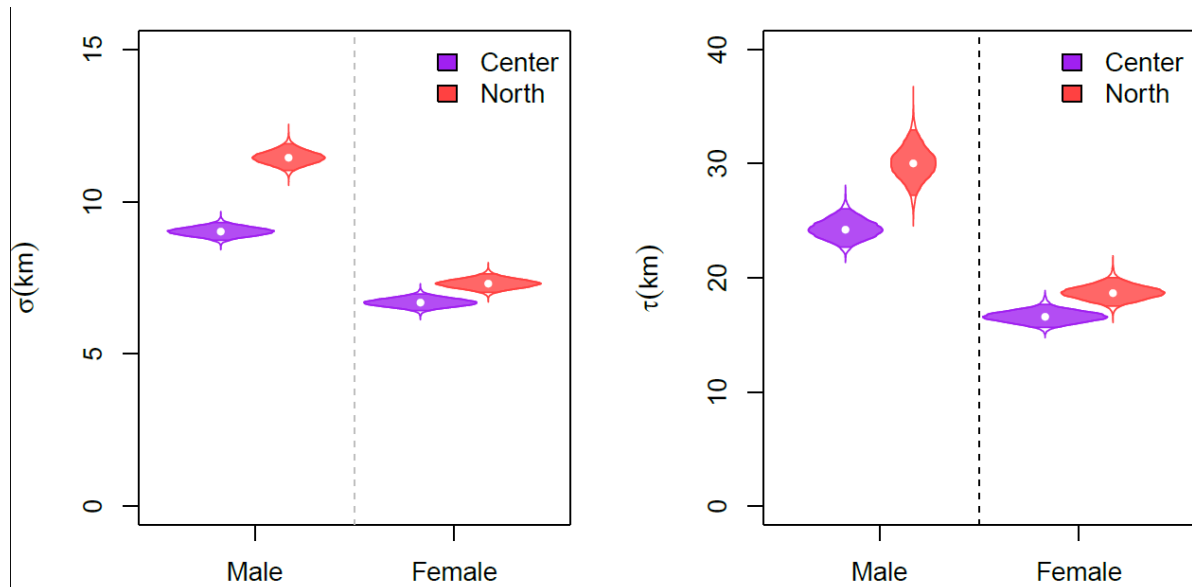

528

529 **Figure S4.** Estimates of the scale parameter  $\sigma$  of the detection function representing range of  
530 movement of individuals around their activity centers (AC), and scale parameter  $\tau$  of the  
531 bivariate normal representing inter-annual movement of AC locations. Estimates are  
532 presented for male and female wolverines for the Central and Northern study areas (Figure  
533 1). Violins show the posterior distribution estimates (points: median estimates; solid colors:  
534 95% credible interval).

535



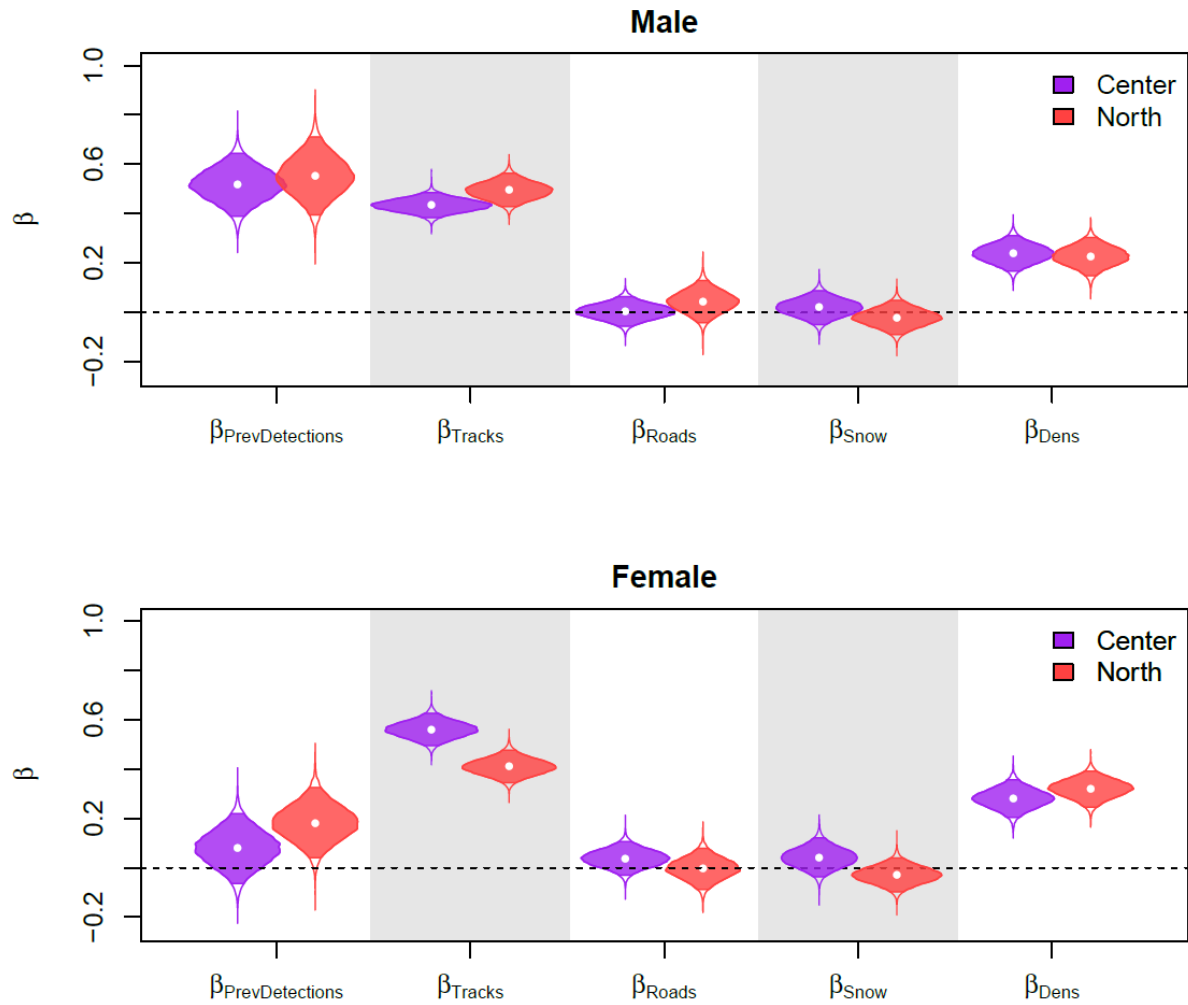

536

537 **Figure S5.** Beta coefficients to model the logit linear effect of spatial covariates on the  
538 baseline detection probability ( $p_0$ :  $\beta_{PrevDetections}$ ,  $\beta_{Tracks}$ ,  $\beta_{Roads}$ ,  $\beta_{Snow}$ ; see OPSCR model  
539 section for further details) and density ( $\beta_{Dens}$ ). Estimates are presented for male and female  
540 wolverines for the Central and Northern study areas (Figure 1). Violins show the posterior  
541 distribution estimates (points: median estimates; solid colors: 95% credible interval).

542

543

North

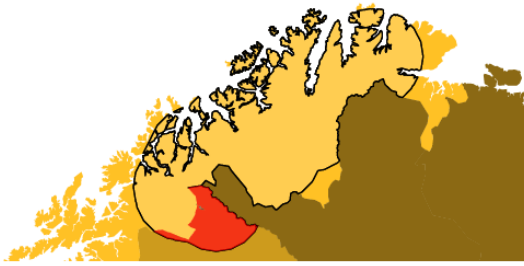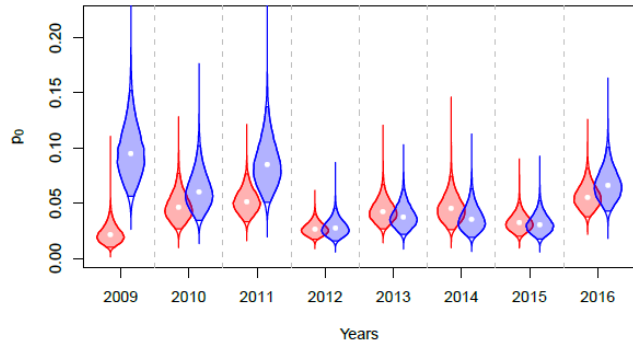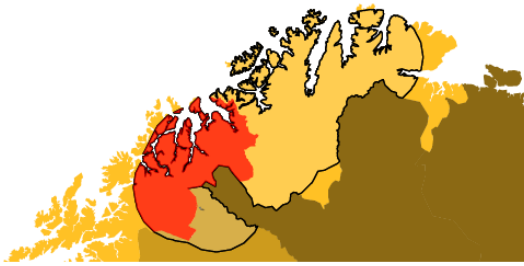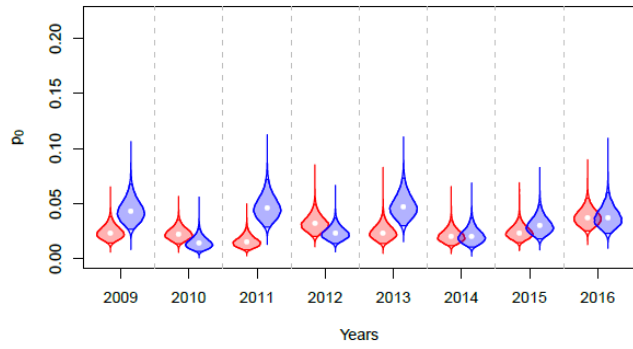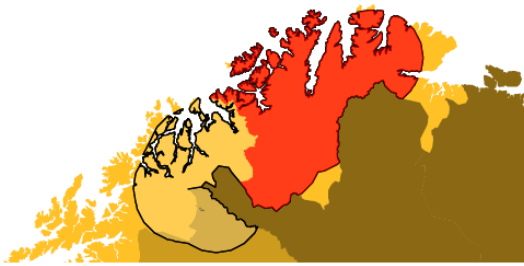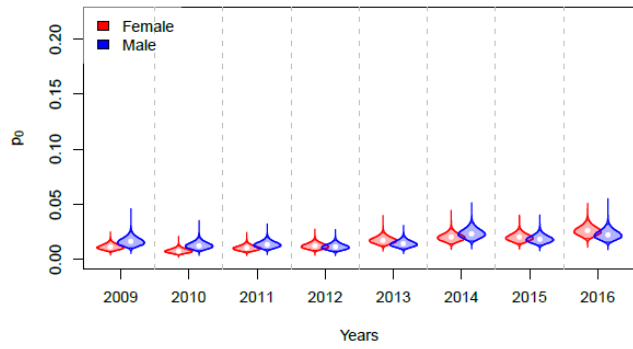

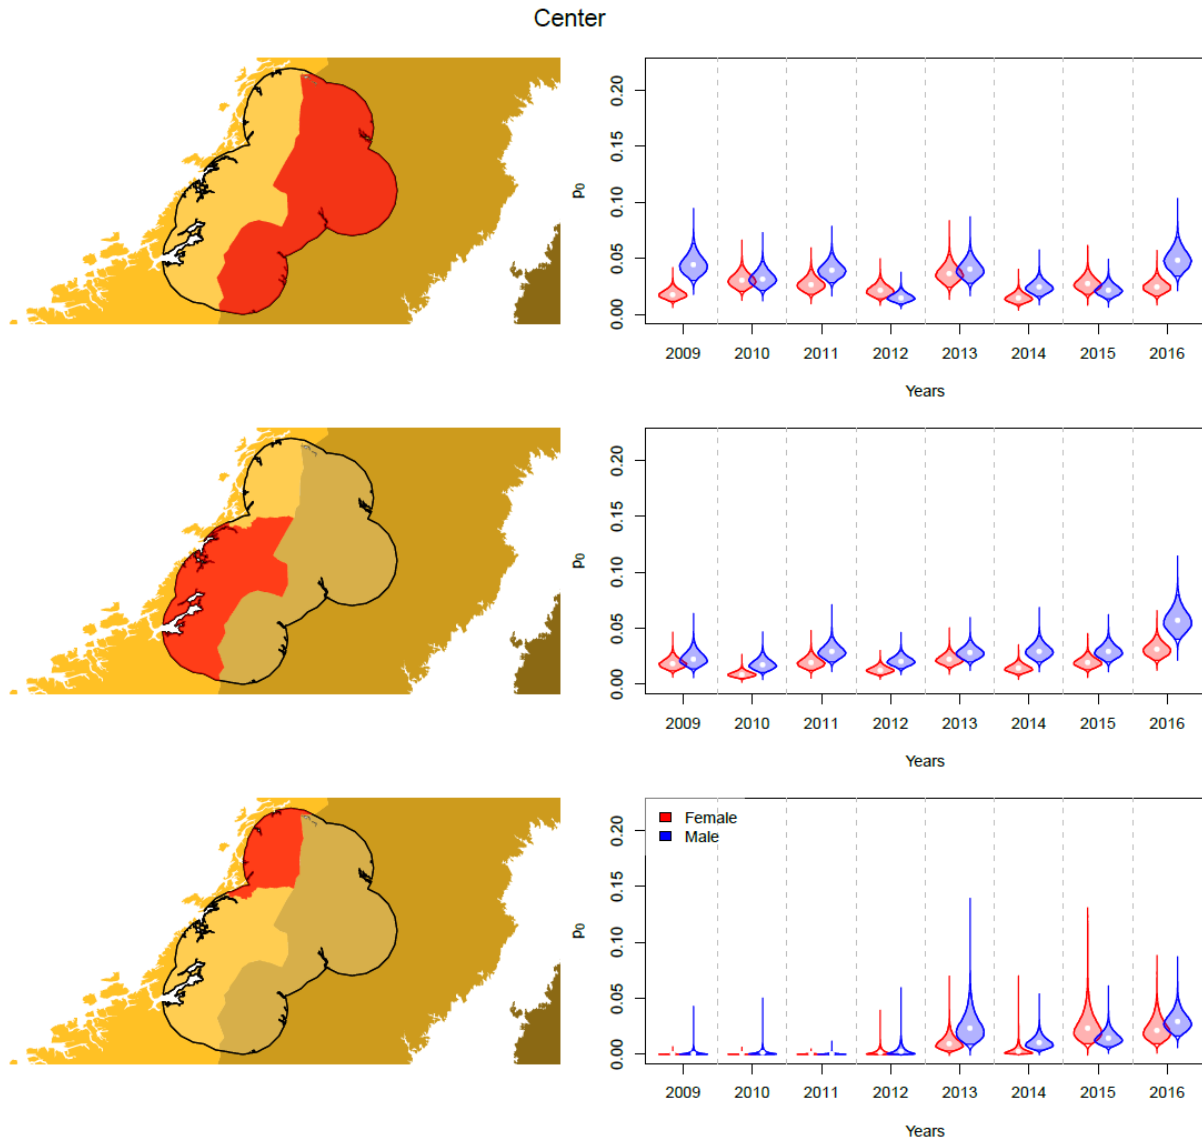

545

546 **Figure S6.** Estimates of the baseline detection probability ( $p_0$ ) presented for male and female  
547 wolverines for the central and northern study areas (Figure 1).  $p_0$  was estimated separately for  
548 each year and for every region (three for the Central and Northern study areas, colored red in  
549 the map from the left panel plot). Violins show the posterior distribution estimates (points:  
550 median estimates; solid colors: 95% credible interval).

551

552

553 **Appendix S2 : Instrumented individuals are not representative of the population.**  
554 **Survival of wolverines with and without GPS collars**

555

556

557 **Cyril Milleret, Richard Bischof, Pierre Dupont, Henrik Brøseth, John Odden, Jenny**  
558 **Mattisson**

559 To account for individual, spatial, and temporal heterogeneity in detection probability  
560 we included several linear effects on a logistic scale on the baseline detection probability ( $p_0$ ):

561 1) Length of GPS search tracks logged by searchers within each detector grid cell in  
562 each monitoring period (*Tracks*).

563 2) Average distance from the nearest road (*Roads*): the distance from each detector to  
564 the closest road (1:100,000, the Swedish mapping, cadastral and land registration authority;  
565 N50 kartdata, the Norwegian Mapping Authority,). This variable represents accessibility,  
566 which we predicted to facilitate detectability.

567 3) Yearly average percentage of snow cover in each detector grid cell (MODIS at 0.1  
568 degrees resolution, [www.neo.sci.gsfc.nasa.gov](http://www.neo.sci.gsfc.nasa.gov), accessed 2019-10-11) between December 1–  
569 June 31 (*Snow*). As wolverine NGS during winter relies heavily on the presence of snow, we  
570 predicted that greater snow cover increases detectability.

571 4) Indicator of whether an individual was detected or not during the previous monitoring  
572 season (*PrevDetection*). Previous detection could be expected to positively influence the  
573 probability of being detected at subsequent occasions (Gervasi et al. 2014).

574 5) Whether the individual was GPS collared (*GPS*) or not to account for different  
575 detection probabilities. Furthermore, we estimated independent baseline detection probabilities  
576 ( $p_{0Intercept}$ ) for each year ( $t$ ):

$$\begin{aligned} 577 \quad \text{logit}(p_{0_{i,j,t}}) &= p_{0_{\text{Intercept}_t}} + \beta_{\text{Tracks}} * \text{Tracks}_{j,t} + \beta_{\text{Snow}} * \text{Snow}_{j,t} + \beta_{\text{Roads}} * \\ 578 \quad \text{Roads}_{j,t} &+ \beta_{\text{PrevDetections}} * \text{PrevDetection}_{i,t} + \beta p_{0_{\text{GPS}}} * \text{GPS}_{i,t} \end{aligned} \quad \text{eqn 2}$$

579 Note that we estimated separate  $\beta$  parameters for each region and sex.

580
